# Supplementary material
Source: publisher figshare collection journal article supplement (https://karger.figshare.com/articles/dataset/_/5127619)
Supplement: Supplementary file 1 [file 1]

## Additional File 2

**Table 1** - Genotype and allele frequencies of the analyzed polymorphisms.

| Gene/SNP ID                      | N   | Genotype | n   | Freq.(%) | 95% CI      | P-value |
|----------------------------------|-----|----------|-----|----------|-------------|---------|
| <b>ABCB1</b><br><b>rs1045642</b> | 206 | CC       | 64  | 31.1     | (24.7-37.4) | 0.240   |
|                                  |     | CT       | 94  | 45.6     | (38.8-52.4) |         |
|                                  |     | TT       | 48  | 23.3     | (17.5-29.1) |         |
|                                  |     | C        | 222 | 53.9     | (49.1-58.7) |         |
|                                  |     | T        | 190 | 46.1     | (41.3-50.9) |         |
| <b>ABCB1</b><br><b>rs1128503</b> | 205 | CC       | 67  | 32.7     | (26.3-39.1) | 0.821   |
|                                  |     | CT       | 99  | 48.3     | (41.5-55.1) |         |
|                                  |     | TT       | 39  | 19.0     | (13.7-24.4) |         |
|                                  |     | C        | 233 | 56.8     | (52-61.6)   |         |
|                                  |     | T        | 177 | 43.2     | (38.4-48)   |         |
| <b>ABCB1</b><br><b>rs2032582</b> | 204 | GG       | 79  | 38.7     | (32-45.4)   | 0.157   |
|                                  |     | GT       | 88  | 43.1     | (36.3-49.9) |         |
|                                  |     | TT       | 37  | 18.1     | (12.8-23.4) |         |
|                                  |     | G        | 246 | 60.3     | (55.5-65)   |         |
|                                  |     | T        | 162 | 39.7     | (35-44.5)   |         |
| <b>ADH1B</b><br><b>rs2066702</b> | 208 | CC       | 206 | 99.0     | (97.7-100)  | 0.944   |
|                                  |     | CT       | 2   | 1.0      | (0-2.3)     |         |
|                                  |     | TT       | 0   | 0.0      | -           |         |
|                                  |     | C        | 414 | 99.5     | (98.9-100)  |         |
|                                  |     | T        | 2   | 0.5      | (0-1.1)     |         |
| <b>ADH1B</b><br><b>rs1229984</b> | 207 | GG       | 174 | 84.1     | (79.1-89)   | 0.918   |
|                                  |     | AG       | 32  | 15.5     | (10.5-20.4) |         |
|                                  |     | AA       | 1   | 0.5      | (0-1.4)     |         |
|                                  |     | G        | 380 | 91.8     | (89.1-94.4) |         |
|                                  |     | A        | 34  | 8.2      | (5.6-10.9)  |         |
| <b>ADH1C</b><br><b>rs698</b>     | 207 | AA       | 103 | 49.8     | (42.9-56.6) | 0.994   |
|                                  |     | AG       | 86  | 41.5     | (34.8-48.3) |         |
|                                  |     | GG       | 18  | 8.7      | (4.9-12.5)  |         |
|                                  |     | A        | 292 | 70.5     | (66.1-74.9) |         |
|                                  |     | G        | 122 | 29.5     | (25.1-33.9) |         |
| <b>ADRB1</b><br><b>rs1801252</b> | 208 | AA       | 167 | 80.3     | (74.9-85.7) | 0.860   |
|                                  |     | AG       | 38  | 18.3     | (13-23.5)   |         |
|                                  |     | GG       | 3   | 1.4      | (0-3.1)     |         |
|                                  |     | A        | 372 | 89.4     | (86.5-92.4) |         |
|                                  |     | G        | 44  | 10.6     | (7.6-13.5)  |         |
| <b>ADRB2</b><br><b>rs1042713</b> | 208 | GG       | 84  | 40.4     | (33.7-47.1) | 0.903   |
|                                  |     | AG       | 97  | 46.6     | (39.9-53.4) |         |
|                                  |     | AA       | 27  | 13.0     | (8.4-17.5)  |         |
|                                  |     | G        | 265 | 63.7     | (59.1-68.3) |         |
|                                  |     | A        | 151 | 36.3     | (31.7-40.9) |         |
| <b>ADRB2</b><br><b>rs1042714</b> | 206 | CC       | 73  | 35.4     | (28.9-42)   | 0.898   |
|                                  |     | CG       | 100 | 48.5     | (41.7-55.4) |         |
|                                  |     | GG       | 33  | 16.0     | (11-21)     |         |
|                                  |     | C        | 246 | 59.7     | (55-64.4)   |         |
|                                  |     | G        | 166 | 40.3     | (35.6-45)   |         |
| <b>COMT</b><br><b>rs4680</b>     | 207 | GG       | 78  | 37.7     | (31.1-44.3) | 0.981   |
|                                  |     | AG       | 98  | 47.3     | (40.5-54.1) |         |
|                                  |     | AA       | 31  | 15.0     | (10.1-19.8) |         |
|                                  |     | G        | 254 | 61.4     | (56.7-66)   |         |
|                                  |     | A        | 160 | 38.6     | (34-43.3)   |         |

<sup>1</sup> zero was assumed since lower limit of 95% Confidence interval (95% CI) was a negative value.

<sup>2</sup> P-values were obtained using the Hardy-Weinberg R package based on the  $\chi^2$  -test.

**Table 1 (continued)** - Genotype and allele frequencies of the analyzed polymorphisms.

| Gene/SNP ID                        | N   | Genotype | n   | Freq.(%) | 95% CI      | P-value |
|------------------------------------|-----|----------|-----|----------|-------------|---------|
| <b>CYP2C19</b><br><b>rs4244285</b> | 207 | GG       | 157 | 75.8     | (70-81.7)   | 0.942   |
|                                    |     | AG       | 47  | 22.7     | (17-28.4)   |         |
|                                    |     | AA       | 3   | 1.4      | (0-3.1)     |         |
|                                    |     | G        | 361 | 87.2     | (84-90.4)   |         |
|                                    |     | A        | 53  | 12.8     | (9.6-16)    |         |
| <b>CYP2C8</b><br><b>rs11572080</b> | 207 | GG       | 157 | 75.8     | (70-81.7)   | 0.092   |
|                                    |     | AG       | 50  | 24.2     | (18.3-30)   |         |
|                                    |     | AA       | 0   | 0.0      | -           |         |
|                                    |     | G        | 364 | 87.9     | (84.8-91.1) |         |
|                                    |     | A        | 50  | 12.1     | (8.9-15.2)  |         |
| <b>CYP2C8</b><br><b>rs10509681</b> | 208 | TT       | 159 | 76.4     | (70.7-82.2) | 0.897   |
|                                    |     | CT       | 45  | 21.6     | (16-27.2)   |         |
|                                    |     | CC       | 4   | 1.9      | (0.1-3.8)   |         |
|                                    |     | T        | 363 | 87.3     | (84.1-90.5) |         |
|                                    |     | C        | 53  | 12.7     | (9.5-15.9)  |         |
| <b>CYP2C9</b><br><b>rs1799853</b>  | 208 | CC       | 154 | 74.0     | (68.1-80)   | 0.780   |
|                                    |     | CT       | 51  | 24.5     | (18.7-30.4) |         |
|                                    |     | TT       | 3   | 1.4      | (0-3.1)     |         |
|                                    |     | C        | 359 | 86.3     | (83-89.6)   |         |
|                                    |     | T        | 57  | 13.7     | (10.4-17)   |         |
| <b>CYP2C9</b><br><b>rs1057910</b>  | 208 | AA       | 194 | 93.3     | (89.9-96.7) | 0.586   |
|                                    |     | CA       | 14  | 6.7      | (3.3-10.1)  |         |
|                                    |     | CC       | 0   | 0.0      | -           |         |
|                                    |     | A        | 402 | 96.6     | (94.9-98.4) |         |
|                                    |     | C        | 14  | 3.4      | (1.6-5.1)   |         |
| <b>CYP2D6</b><br><b>rs1065852</b>  | 208 | CC       | 149 | 71.6     | (65.5-77.8) | 0.033   |
|                                    |     | CT       | 59  | 28.4     | (22.2-34.5) |         |
|                                    |     | TT       | 0   | 0.0      | -           |         |
|                                    |     | C        | 357 | 85.8     | (82.5-89.2) |         |
|                                    |     | T        | 59  | 14.2     | (10.8-17.5) |         |
| <b>CYP2D6</b><br><b>rs3892097</b>  | 205 | GG       | 152 | 74.1     | (68.2-80.1) | 0.064   |
|                                    |     | AG       | 53  | 25.9     | (19.9-31.8) |         |
|                                    |     | AA       | 0   | 0.0      | -           |         |
|                                    |     | G        | 357 | 87.1     | (83.8-90.3) |         |
|                                    |     | A        | 53  | 12.9     | (9.7-16.2)  |         |
| <b>CYP2D6</b><br><b>rs5030655</b>  | 208 | TT       | 206 | 99.0     | (97.7-100)  | 0.944   |
|                                    |     | T/-      | 2   | 1.0      | (0-2.3)     |         |
|                                    |     | -/-      | 0   | 0.0      | -           |         |
|                                    |     | T        | 414 | 99.5     | (98.9-100)  |         |
|                                    |     | -        | 2   | 0.5      | (0-1.1)     |         |
| <b>CYP2D6</b><br><b>rs5030656</b>  | 208 | AAG/AAG  | 192 | 92.3     | (88.7-95.9) | 0.717   |
|                                    |     | AAG/-    | 16  | 7.7      | (4.1-11.3)  |         |
|                                    |     | -/-      | 0   | 0.0      | -           |         |
|                                    |     | AAG      | 400 | 96.2     | (94.3-98)   |         |
|                                    |     | -        | 16  | 3.8      | (2-5.7)     |         |
| <b>CYP2D6</b><br><b>rs16947</b>    | 208 | GG       | 77  | 37.0     | (30.5-43.6) | 0.845   |
|                                    |     | GA       | 98  | 47.1     | (40.3-53.9) |         |
|                                    |     | AA       | 33  | 15.9     | (10.9-20.8) |         |
|                                    |     | G        | 252 | 60.6     | (55.9-65.3) |         |
|                                    |     | A        | 164 | 39.4     | (34.7-44.1) |         |

<sup>1</sup> zero was assumed since lower limit of 95% Confidence interval (95% CI) was a negative value.<sup>2</sup> P-values were obtained by HardyWeinberg R package based on the  $\chi^2$ -test.

**Table 1 (continued)** - Genotype and allele frequencies of the analyzed polymorphisms.

| Gene/SNP ID                          | N   | Genotype | n   | Freq.(%) | 95% CI      | P-value |
|--------------------------------------|-----|----------|-----|----------|-------------|---------|
| <b>CYP3A4</b><br><b>rs2740574</b>    | 204 | AA       | 188 | 92.2     | (88.5-95.8) | 0.738   |
|                                      |     | AG       | 16  | 7.8      | (4.2-11.5)  |         |
|                                      |     | GG       | 0   | 0.0      | -           |         |
|                                      |     | A        | 392 | 96.1     | (94.2-98)   |         |
|                                      |     | G        | 16  | 3.9      | (2-5.8)     |         |
| <b>DPYD</b><br><b>rs67376798</b>     | 207 | AA       | 204 | 98.6     | (96.9-100)  | 0.916   |
|                                      |     | AT       | 3   | 1.4      | (0 3.1)     |         |
|                                      |     | TT       | 0   | 0.0      | -           |         |
|                                      |     | A        | 411 | 99.3     | (98.5-100)  |         |
|                                      |     | T        | 3   | 0.7      | (0-1.5)     |         |
| <b>DPYD</b><br><b>rs1801265</b>      | 207 | CC       | 141 | 68.1     | (61.8-74.5) | 0.595   |
|                                      |     | CT       | 61  | 29.5     | (23.3-35.7) |         |
|                                      |     | TT       | 5   | 2.4      | (0.3-4.5)   |         |
|                                      |     | C        | 343 | 82.9     | (79.2-86.5) |         |
|                                      |     | T        | 71  | 17.1     | (13.5-20.8) |         |
| <b>F5</b><br><b>rs6025</b>           | 207 | GG       | 201 | 97.1     | (94.8-99.4) | 0.832   |
|                                      |     | GA       | 6   | 2.9      | (0.6-5.2)   |         |
|                                      |     | AA       | 0   | 0.0      | -           |         |
|                                      |     | G        | 408 | 98.6     | (97.4-99.7) |         |
|                                      |     | A        | 6   | 1.5      | (0.3-2.6)   |         |
| <b>GSTP1</b><br><b>rs1695</b>        | 207 | AA       | 90  | 43.5     | (36.7-50.2) | 0.842   |
|                                      |     | AG       | 92  | 44.4     | (37.7-51.2) |         |
|                                      |     | GG       | 25  | 12.1     | (7.6-16.5)  |         |
|                                      |     | A        | 272 | 65.7     | (61.1-70.3) |         |
|                                      |     | G        | 142 | 34.3     | (29.7-38.9) |         |
| <b>GSTT1</b><br><b>Gene deletion</b> | 208 | Present  | 162 | 77.9     | (72.2-83.5) | -       |
|                                      |     | Absent   | 46  | 22.1     | (16.5-27.8) |         |
| <b>KCNJ11</b><br><b>rs5219</b>       | 207 | CC       | 90  | 43.5     | (36.7-50.2) | 0.532   |
|                                      |     | CT       | 96  | 46.4     | (39.6-53.2) |         |
|                                      |     | TT       | 21  | 10.1     | (6-14.3)    |         |
|                                      |     | C        | 276 | 66.7     | (62.1-71.2) |         |
|                                      |     | T        | 138 | 33.3     | (28.8-37.9) |         |
| <b>MTHFR</b><br><b>rs1801131</b>     | 208 | AA       | 109 | 52.4     | (45.6-59.2) | 0.212   |
|                                      |     | CA       | 78  | 37.5     | (30.9-44.1) |         |
|                                      |     | CC       | 21  | 10.1     | (6-14.2)    |         |
|                                      |     | A        | 296 | 71.2     | (66.8-75.5) |         |
|                                      |     | C        | 120 | 28.8     | (24.5-33.2) |         |
| <b>MTHFR</b><br><b>rs1801133</b>     | 208 | CC       | 94  | 45.2     | (38.4-52)   | 0.890   |
|                                      |     | CT       | 91  | 43.8     | (37-50.5)   |         |
|                                      |     | TT       | 23  | 11.1     | (6.8-15.3)  |         |
|                                      |     | C        | 279 | 67.1     | (62.6-71.6) |         |
|                                      |     | T        | 137 | 32.9     | (28.4-37.4) |         |
| <b>NAT2</b><br><b>rs1799930</b>      | 169 | GG       | 87  | 51.5     | (43.9-59)   | 0.328   |
|                                      |     | AG       | 72  | 42.6     | (35.1-50.1) |         |
|                                      |     | AA       | 10  | 5.9      | (2.4-9.5)   |         |
|                                      |     | G        | 246 | 72.8     | (68-77.5)   |         |
|                                      |     | A        | 92  | 27.2     | (22.5-32)   |         |

<sup>1</sup> zero was assumed since lower limit of 95% Confidence interval (95% CI) was a negative value.<sup>2</sup> P-values were obtained by Hardy-Weinberg R package based on the  $\chi^2$  -test.

**Table 1 (continued)** - Genotype and allele frequencies of the analyzed polymorphisms.

| Gene/SNP ID                       | N   | Genotype          | n   | Freq.(%) | 95% CI      | P- value |
|-----------------------------------|-----|-------------------|-----|----------|-------------|----------|
| <b>NAT2</b><br><b>rs1799931</b>   | 147 | GG                | 144 | 98.0     | (95.7-100)  | 0.901    |
|                                   |     | AG                | 3   | 2.0      | (0-4.3)     |          |
|                                   |     | AA                | 0   | 0.0      | -           |          |
|                                   |     | G                 | 291 | 99.0     | (97.8-100)  |          |
|                                   |     | A                 | 3   | 1.0      | (0-2.2)     |          |
| <b>TPMT</b><br><b>rs1800462</b>   | 207 | GG                | 206 | 99.5     | (98.6-100)  | 0.972    |
|                                   |     | CG                | 1   | 0.5      | (0-1.4)     |          |
|                                   |     | CC                | 0   | 0.0      | -           |          |
|                                   |     | G                 | 413 | 99.8     | (99.3-100)  |          |
|                                   |     | C                 | 1   | 0.2      | (0-0.7)     |          |
| <b>TPMT</b><br><b>rs1800460</b>   | 207 | GG                | 200 | 96.6     | (94.2-99.1) | 0.805    |
|                                   |     | AG                | 7   | 3.4      | (0.9-5.8)   |          |
|                                   |     | AA                | 0   | 0.0      | -           |          |
|                                   |     | G                 | 407 | 98.3     | (97.1-99.6) |          |
|                                   |     | A                 | 7   | 1.7      | (0.4-2.9)   |          |
| <b>TPMT</b><br><b>rs1142345</b>   | 207 | AA                | 194 | 93.7     | (90.4-97)   | 0.512    |
|                                   |     | AG                | 13  | 6.3      | (3-9.6)     |          |
|                                   |     | GG                | 0   | 0.0      | -           |          |
|                                   |     | A                 | 401 | 96.9     | (95.2-98.5) |          |
|                                   |     | G                 | 13  | 3.1      | (1.5-4.8)   |          |
| <b>TYMS</b><br><b>rs34743033</b>  | 208 | 3R/3R             | 76  | 36.5     | (30-43.1)   | -        |
|                                   |     | 3R/2R             | 86  | 41.3     | (34.7-48)   |          |
|                                   |     | 2R/2R             | 42  | 20.2     | (14.7-25.6) |          |
|                                   |     | 4R/4R             | 0   | 0.0      | -           |          |
|                                   |     | 4R/3R             | 3   | 1.4      | (0-3.1)     |          |
|                                   |     | 4R/2R             | 1   | 0.5      | (0-1.4)     |          |
|                                   |     | 3 R               | 241 | 57.9     | (53.2-62.7) |          |
|                                   |     | 2 R               | 171 | 41.1     | (36.4-45.8) |          |
|                                   |     | 4 R               | 4   | 1.0      | (0-1.9)     |          |
| <b>TYMS</b><br><b>rs2853542</b>   | 208 | GG                | 18  | 8.7      | (4.9-12.5)  | -        |
|                                   |     | GC                | 34  | 16.3     | (11.3-21.3) |          |
|                                   |     | CC                | 24  | 11.5     | (7.2-15.8)  |          |
|                                   |     | G-                | 39  | 18.8     | (13.5-24.1) |          |
|                                   |     | C-                | 47  | 22.6     | (16.9-28.3) |          |
|                                   |     | -/-               | 46  | 22.1     | (16.5-27.7) |          |
|                                   |     | G                 | 109 | 26.2     | (22-30.4)   |          |
|                                   |     | C                 | 129 | 31.0     | (26.6-35.4) |          |
|                                   |     | -                 | 178 | 42.8     | (38-47.6)   |          |
| <b>TYMS</b><br><b>rs34489327</b>  | 208 | TTAAAG/TTAAAG     | 76  | 36.5     | (30-43.1)   | 0.529    |
|                                   |     | -/TTAAAG          | 103 | 49.5     | (42.7-56.3) |          |
|                                   |     | -/-               | 29  | 13.9     | (9.2-18.6)  |          |
|                                   |     | TTAAAG            | 255 | 61.3     | (56.6-66)   |          |
|                                   |     | -                 | 161 | 38.7     | (34-43.4)   |          |
| <b>UGT1A1</b><br><b>rs8175347</b> | 204 | (TA)6TAA/(TA)6TAA | 90  | 44.1     | (37.3-50.9) | 0.999    |
|                                   |     | (TA)6TAA/(TA)7TAA | 91  | 44.6     | (37.8-51.4) |          |
|                                   |     | (TA)7TAA/(TA)7TAA | 23  | 11.3     | (6.9-15.6)  |          |
|                                   |     | (TA)6TAA          | 271 | 66.4     | (61.8-71)   |          |
|                                   |     | (TA)7TAA          | 137 | 33.6     | (29-38.2)   |          |
| <b>VKORC1</b><br><b>rs9923231</b> | 208 | GG                | 61  | 29.3     | (23.1-35.5) | 0.026    |
|                                   |     | GA                | 118 | 56.7     | (50-63.5)   |          |
|                                   |     | AA                | 29  | 13.9     | (9.2-18.6)  |          |
|                                   |     | G                 | 240 | 57.7     | (52.9-62.4) |          |
|                                   |     | A                 | 176 | 42.3     | (37.6-47.1) |          |

<sup>1</sup> zero was assumed since lower limit of 95% Confidence interval 95% CI was a negative value.<sup>2</sup> P-values were obtained by Hardy-Weinberg R package based on the  $\chi^2$ -test.
