# Supplementary material
Source: publisher figshare collection journal article supplement (https://karger.figshare.com/articles/dataset/_/5127619)
Supplement: Supplementary file 2 [file 1]

## Additional File 1 - Genotyping Conditions

**Table 1.** Primer sequences used in the iPlex Gold reaction, Sequenom Mass Array genotyping platform.

| GENE           | NCBI ID    | Primer name | Sequence                        |
|----------------|------------|-------------|---------------------------------|
| <i>ABCB1</i>   | rs1045642  | Forward     | ACGTTGGATGTATGTTGGCCTCCTTTGCTG  |
|                |            | Reverse     | ACGTTGGATGACTGCAGCATTGCTGAGAAC  |
|                |            | Extend      | CTTCCTTTGCTGCCCTCAC             |
| <i>ABCB1</i>   | rs1128503  | Forward     | ACGTTGGATGCACAGCCACTGTTTCCAACC  |
|                |            | Reverse     | ACGTTGGATGGTTTTTTTCTCACTCGTCCTG |
|                |            | Extend      | CCTATGCACCTTCAGGTTTCAG          |
| <i>ABCB1</i>   | rs2032582  | Forward     | ACGTTGGATGGCAATAGCAGGAGTTGTTGA  |
|                |            | Reverse     | ACGTTGGATGCATATTTAGTTTGACTCACC  |
|                |            | Extend      | AGATAAGAAAGAACTAGAAAGGT         |
| <i>ADH1B</i>   | rs1229984  | Forward     | ACGTTGGATGCTGAATCTGAACAGCTTCTC  |
|                |            | Reverse     | ACGTTGGATGTTGCCACTAACCACGTGGTC  |
|                |            | Extend      | GTGGCTGTAGGAATCTGTC             |
| <i>ADH1C</i>   | rs698      | Forward     | ACGTTGGATGGGCTAAGAAGTTTTCACTGG  |
|                |            | Reverse     | ACGTTGGATGGAAGCAGGTCAAATCCTTCA  |
|                |            | Extend      | CACTGGATGCATTAATAACAAAT         |
| <i>ADRB2</i>   | rs1042714  | Forward     | ACGTTGGATGCAGGACGATGAGAGACATGA  |
|                |            | Reverse     | ACGTTGGATGGAAGCCATGCGCCGGACCA   |
|                |            | Extend      | CCACACCTCGTCCCTTT               |
| <i>COMT</i>    | rs4680     | Forward     | ACGTTGGATGTTTTCCAGGTCTGACAACGG  |
|                |            | Reverse     | ACGTTGGATGACCCAGCGGATGGTGGATTT  |
|                |            | Extend      | TGCACACCTTGTCTTCA               |
| <i>CYP2C19</i> | rs4244285  | Forward     | ACGTTGGATGCACTTTCCATAAAAGCAAGG  |
|                |            | Reverse     | ACGTTGGATGGCAATAATTTTCCCCTATC   |
|                |            | Extend      | AAGTAATTTGTTATGGGTTC            |
| <i>CYP2C19</i> | rs4986893  | Forward     | ACGTTGGATGAACATCAGGATTGTAAGCAC  |
|                |            | Reverse     | ACGTTGGATGGACTGTAAGTGGTTTCTCAG  |
|                |            | Extend      | TATTGTAAGCACCCCTG               |
| <i>CYP2C8</i>  | rs11572080 | Forward     | ACGTTGGATGTGAGCTTCCTCTTGAACACG  |
|                |            | Reverse     | ACGTTGGATGAAGAGATGGAAGGAGATCCG  |
|                |            | Extend      | CTTTAACACGGTCCTCAATGCTC         |
| <i>CYP3A5</i>  | rs776746   | Forward     | ACGTTGGATGACCCAGCTTAACGAATGCTC  |
|                |            | Reverse     | ACGTTGGATGGTAATGTGGTCCAAACAGGG  |
|                |            | Extend      | AATGTAAAGAGCTCTTTTGTCTTCA       |

**Table 1 (Continued).** Primer sequences used in the iPlex Gold reaction, Sequenom Mass Array genotyping platform.

| GENE          | NCBI ID    | Primer name | Sequence                        |
|---------------|------------|-------------|---------------------------------|
| <b>CYP2D6</b> | rs3892097  | Forward     | ACGTTGGATGACCCCTTACCCGCATCTCC   |
|               |            | Reverse     | ACGTTGGATGTGCTCACGGCTTTGTCCAAG  |
|               |            | Extend      | TACACGCATCTCCCACCCCA            |
| <b>DPYD</b>   | rs67376798 | Forward     | ACGTTGGATGCAACGTAGAGCAAGTTGTGG  |
|               |            | Reverse     | ACGTTGGATGCTTACCTGGTAGCCAGAATC  |
|               |            | Extend      | GATCAAGTTGTGGCTATGATTG          |
| <b>DPYD</b>   | rs1801265  | Forward     | ACGTTGGATGATGCTGTCTTTAGAGTATC   |
|               |            | Reverse     | ACGTTGGATGGTCTAATTTCTTGGCCGAAG  |
|               |            | Extend      | CAAACATCATGCAACTCTG             |
| <b>DPYD</b>   | rs55886062 | Forward     | ACGTTGGATGAACTCCAGCCACCAGCACAT  |
|               |            | Reverse     | ACGTTGGATGGAGAAAGTTTGGTGAGGGC   |
|               |            | Extend      | CCACTCCAGCCACCAGCACATCAATGA     |
| <b>F5</b>     | rs6025     | Forward     | ACGTTGGATGCATCGCCTCTGGGCTAATAG  |
|               |            | Reverse     | ACGTTGGATGCTTCAAGGACAAAATACCTG  |
|               |            | Extend      | TAAGAGCAGATCCCTGGACAGGC         |
| <b>GSTP1</b>  | rs1695     | Forward     | ACGTTGGATGTGGTGGACATGGTGAATGAC  |
|               |            | Reverse     | ACGTTGGATGAACCCTGGTGCAGATGCTC   |
|               |            | Extend      | ACCTCCGCTGCAAATAC               |
| <b>KCNJ11</b> | rs5219     | Forward     | ACGTTGGATGTCCGCTGGCGGGCACGGTA   |
|               |            | Reverse     | ACGTTGGATGGGCATCATCCCCGAGGAATA  |
|               |            | Extend      | GGGCACGGTACCTGGGCT              |
| <b>TPMT</b>   | rs1800462  | Forward     | ACGTTGGATGCCCTCTATTTAGTCATTG    |
|               |            | Reverse     | ACGTTGGATGACACCAACTACACTGTGTCC  |
|               |            | Extend      | AAATGTATGATTTTATGCAGGTTT        |
| <b>TPMT</b>   | rs1800460  | Forward     | ACGTTGGATGGCAAATTTGACATGATTTGGG |
|               |            | Reverse     | ACGTTGGATGGACAGCTAAACAAAAAAG    |
|               |            | Extend      | CATGATTTGGGATAGAGGA             |
| <b>TPMT</b>   | rs1800584  | Forward     | ACGTTGGATGGAATCCCTGATGTCATTCTTC |
|               |            | Reverse     | ACGTTGGATGAGCATCAACCTTCTCAAGAC  |
|               |            | Extend      | TGTTACTCTTTCTTGTTCA             |
| <b>TPMT</b>   | rs1142345  | Forward     | ACGTTGGATGCCTCAAAAACATGTCAGTGTG |
|               |            | Reverse     | ACGTTGGATGGGGAATTGACTGTCTTTTG   |
|               |            | Extend      | GTCTCATTTACTTTTCTGTAAGTAGA      |

**Table 2.** Primers and restriction enzymes used in the RFLPs genotyping method.

| Gene                 | NCBI ID    | Primer name | Sequence                                         | Restriction Enzyme |
|----------------------|------------|-------------|--------------------------------------------------|--------------------|
| <b><i>ADH1B</i></b>  | rs2066702  | Forward     | AGCTGGGATCACAGACAGATTT                           | <i>AlwNI</i>       |
|                      |            | Reverse     | GGCATCTCTATTGCCTCAAAAC                           |                    |
| <b><i>ADRB1</i></b>  | rs1801252  | Forward     | CCGGGCTTCTGGGGTGTTC                              | <i>Eco0109I</i>    |
|                      |            | Reverse     | GGCGAGGTGATGGCGAGGTAGC                           |                    |
| <b><i>ADRB2</i></b>  | rs1042713  | Forward     | CTTCTTGCTGGCACGCAAT                              | <i>BsrDI</i>       |
|                      |            | Reverse     | CCAGTGAAGTGATGAAGTAGTTGG                         |                    |
| <b><i>CYP2C8</i></b> | rs10509681 | Forward     | CTGCTGAGAAAGGCATGAAG                             | <i>XmnI</i>        |
|                      |            | Reverse     | CTTCCGTGCTACATGATGACG                            |                    |
| <b><i>CYP2C9</i></b> | rs1799853  | Forward     | GTATTTTGGCCTGAAACCATA                            | <i>AvaII</i>       |
|                      |            | Reverse     | GGCCTTGGTTTTTCTCAACTC                            |                    |
| <b><i>CYP2C9</i></b> | rs1057910  | Forward     | TGCACGAGGTCCAGAGGTAC                             | <i>KpnI</i>        |
|                      |            | Reverse     | ACAAACTTACCTTGGGAATGAGA                          |                    |
| <b><i>CYP2D6</i></b> | rs35742686 | Forward     | GGTCAGTGGTAAGGACAGGCAGGC                         | <i>StuI</i>        |
|                      |            | Reverse     | CC<br>TCTCGGGGGGGCTGGGCTGGGTCC<br>CAGGTCATCC     |                    |
| <b><i>CYP2D6</i></b> | rs5030655  | Forward     | TGCGCAACTTGGGCCTGGGCAAGA                         | <i>SpeI</i>        |
|                      |            | Reverse     | AGTCGCTGGACTAG<br>CTCGGGAGCTCGCCTTGCAGAGAC<br>TC |                    |
| <b><i>CYP2D6</i></b> | rs5030656  | Forward     | AGGCCTTCCTGGCAGAGATGAAG                          | <i>MboII</i>       |
|                      |            | Reverse     | AAAATGCACTGTTTCCCAGA                             |                    |
| <b><i>CYP2D6</i></b> | rs16947    | Foward      | GCTGGGGCCTGAGACTT                                | <i>HhaI</i>        |
|                      |            | Reverse     | GGCTATCACCAGGGGCTGGTGCT                          |                    |
| <b><i>CYP2D6</i></b> | rs1065852  | Foward      | GCTGGGGCCTGAGACTT                                | <i>HhaI</i>        |
|                      |            | Reverse     | GGCTATCACCAGGGGCTGGTGCT                          |                    |
| <b><i>CYP3A4</i></b> | rs2740574  | Forward     | GGAATGAGGACAGCCATAGAGACA                         | <i>MboII</i>       |
|                      |            | Reverse     | AGGGGA<br>CCTTTCAGCTCTGTGTTGCTCTTTGC             |                    |
| <b><i>DPYD</i></b>   | rs3918290  | Foward      | TGCAAATATGTGAGGAGGGACC                           | <i>HpyCHJ4 IV</i>  |
|                      |            | Reverse     | CAGCAAAGCAACTGGCAGATTC                           |                    |
| <b><i>GSTT1</i></b>  | deletion   | Forward     | TTCCTTACTGGTCCTCACATC                            | †                  |
|                      |            | Reverse     | TCACCGGATCATGGCCAGCA                             |                    |
| <b><i>MTHFR</i></b>  | rs1801131  | Forward     | AGAGCAAGTCCCCCAAGGA                              | <i>MboII</i>       |
|                      |            | Reverse     | CTTTGTGACCATTCGGTTTG                             |                    |
| <b><i>MTHFR</i></b>  | rs1801133  | Forward     | GAAGCAGGGAGCTTTGAGG                              | <i>HinfI</i>       |
|                      |            | Reverse     | ACGATGGGGCAAGTGATG                               |                    |
| <b><i>TYMS</i></b>   | rs34489327 | Forward     | CAAATCTGAGGGAGCTGAGT                             | <i>DraI</i>        |
|                      |            | Reverse     | CAGATAAGTGGCAGTACAGA                             |                    |

**Table 2 (Continued).** Primers and restriction enzymes used in the RFLPs genotyping method.

| Gene          | NCBI ID    | Primer name | Sequence                                    | Restriction Enzyme |
|---------------|------------|-------------|---------------------------------------------|--------------------|
| <i>TYMS</i>   | rs34743033 | Forward     | GTGGCTCCTGCGTTTCCCCC                        | <sup>2</sup>       |
|               |            | Reverse     | CCAAGCTTGGCTCCGAGCCG<br>GCCACAGGCATGGCGCCGG |                    |
| <i>TYMS</i>   | rs2853542  | Forward     | GTGGCTCCTGCGTTTCCCCC                        | HaeIII             |
|               |            | Reverse     | CCAAGCTTGGCTCCGAGCCG<br>GCCACAGGCATGGCGCCGG |                    |
| <i>NAT2</i>   | rs1799930  | Forward     | GGAACAAATTGGACTTGG                          | TaqαI              |
|               |            | Reverse     | TCTAGCATGAATCACTCTGC                        |                    |
| <i>NAT2</i>   | rs1799931  | Forward     | GGAACAAATTGGACTTGG                          | BamHI              |
|               |            | Reverse     | TCTAGCATGAATCACTCTGC                        |                    |
| <i>NAT2</i>   | rs1799929  | Forward     | GGAACAAATTGGACTTGG                          | KpnI               |
|               |            | Reverse     | TCTAGCATGAATCACTCTGC                        |                    |
| <i>NAT2</i>   | rs1801279  | Forward     | GGAACAAATTGGACTTGG                          | MspI               |
|               |            | Reverse     | TCTAGCATGAATCACTCTGC                        |                    |
| <i>VKORC1</i> | rs9923231  | Forward     | AGTTTGGACTACAGGTGCCT                        | MspI               |
|               |            | Reverse     | GCCAGCAGGAGAGGGAAATA                        |                    |

<sup>1</sup>It was detected by presence/absence of the amplified PCR product, given that this polymorphism is insertion/deletion in the *GSTT1* gene.

<sup>2</sup>It was detected by fragment size differences of the 28pb tandem repeats.

**Table 3.** Primers used in the sequencing method.

| Gene          | NCBI ID   | Primer name | Sequence                     |
|---------------|-----------|-------------|------------------------------|
| <i>UGT1A1</i> | rs8175347 | Forward     | TCTCTGAAAGTGAAGTCCCTGCTACCTT |
|               |           | Reverse     | AAACATTATGCCCCGAGACTAACAA    |
